# Supplementary material
Source: publisher figshare collection journal article supplement (https://gsajournals.figshare.com/ndownloader/files/14831855)
Supplement: Supplementary file 1 [file 14831855]

## Sheet: Table_S1__Random_Exp__PopInf
Table S1
Mean and maximum number of alleles and intrinsic merit ranges for both the AO model and the DAA model and each scenario of the Random experiment for an effectively infinite population
						Number of Alleles						Intrinsic merit range						Overdominance
Scenario	Setting					DAA model		AO model		Rel. deviation AO to DAA		DAA model		AO model		Rel. deviation AO to DAA		DAA model	AO model	Rel. deviation AO to DAA
Number	Max. intr. merit	Min. intr. merit	Range intr. merit	Multiplier f	Num. alleles init.	Weighted mean	Maximum	Weighted mean	Maximum	Weighted mean	Maximum	Weighted mean	Maximum	Weighted mean	Maximum	Weighted mean	Maximum	Overdom. rel. (%)	Overdom. rel. (%)	Overdom. rel. (%)
1	0.1	0	0.1	2	50	10.0086	17	10.0551	17	0.004646	0	0.016	0.031	0.0158	0.031	-0.0125	0	0.870769	0.860699	-0.0115645
2	0.1	0	0.1	2	100	14.102	23	14.1591	23	0.00404907	0	0.0122	0.022	0.012	0.021	-0.0163934	-0.0454545	0.882215	0.881038	-0.00133414
3	0.1	0	0.1	2	250	22.255	31	22.3125	34	0.00258369	0.0967742	0.0082	0.0126	0.0081	0.0124	-0.0121951	-0.015873	0.888778	0.888283	-0.000556944
4	0.1	0	0.1	2	500	31.622	42	31.708	42	0.00271963	0	0.006	0.0087	0.0059	0.0084	-0.0166667	-0.0344828	0.892139	0.891869	-0.000302643
5	0.1	0	0.1	2	1000	43.88	54	43.92	55	0.000911577	0.0185185	0.0043	0.0052	0.0043	0.0052	0	0	0.894654	0.894469	-0.000206784
6	0.1	0	0.1	10	50	10.0638	19	10.0736	19	0.000973787	0	0.0159	0.0322	0.0158	0.0302	-0.00628931	-0.0621118	0.865557	0.862704	-0.00329614
7	0.1	0	0.1	10	100	14.1794	22	14.1863	22	0.000486621	0	0.0121	0.0219	0.0121	0.0202	0	-0.0776256	0.881134	0.880923	-0.000239464
8	0.1	0	0.1	10	250	22.275	32	22.2905	32	0.000695847	0	0.0082	0.0121	0.0081	0.0124	-0.0121951	0.0247934	0.888463	0.888359	-0.000117056
9	0.1	0	0.1	10	500	31.636	42	31.626	42	-0.000316096	0	0.0059	0.0081	0.0059	0.0081	0	0	0.892001	0.891968	-3.69955e-05
10	0.1	0	0.1	10	1000	44.93	55	45.03	54	0.00222568	-0.0181818	0.0043	0.0052	0.0043	0.0052	0	0	0.894433	0.894406	-3.01867e-05
11	0.55	0.45	0.1	2	50	23.3487	31	23.6912	33	0.0146689	0.0645161	0.0441	0.066	0.0422	0.063	-0.0430839	-0.0454545	0.45926	0.454085	-0.0112681
12	0.55	0.45	0.1	2	100	33.0198	44	33.3652	45	0.0104604	0.0227273	0.0322	0.0475	0.031	0.0435	-0.0372671	-0.0842105	0.454798	0.454087	-0.00156333
13	0.55	0.45	0.1	2	250	52.124	65	52.4355	69	0.00597613	0.0615385	0.021	0.027	0.0202	0.0262	-0.0380952	-0.0296296	0.452796	0.452513	-0.000625006
14	0.55	0.45	0.1	2	500	73.744	88	74.01	90	0.00360707	0.0227273	0.015	0.0187	0.0144	0.0174	-0.04	-0.0695187	0.451882	0.451746	-0.000300964
15	0.55	0.45	0.1	2	1000	104.8	121	104.76	123	-0.000381679	0.0165289	0.0107	0.0129	0.0102	0.0117	-0.046729	-0.0930233	0.451252	0.451182	-0.000155124
16	0.55	0.45	0.1	10	50	23.6694	33	23.7321	34	0.00264899	0.030303	0.0428	0.0644	0.0423	0.0624	-0.0116822	-0.0310559	0.456873	0.454945	-0.00421999
17	0.55	0.45	0.1	10	100	33.2976	45	33.3646	44	0.00201216	-0.0222222	0.0313	0.0464	0.0309	0.0447	-0.0127796	-0.0366379	0.454215	0.454072	-0.000314829
18	0.55	0.45	0.1	10	250	52.595	66	52.675	65	0.00152106	-0.0151515	0.0203	0.0264	0.0201	0.0252	-0.00985222	-0.0454545	0.452559	0.452503	-0.000123741
19	0.55	0.45	0.1	10	500	73.962	89	74.032	90	0.000946432	0.011236	0.0146	0.0175	0.0144	0.0169	-0.0136986	-0.0342857	0.451615	0.451582	-7.30711e-05
20	0.55	0.45	0.1	10	1000	105.03	119	105.29	119	0.00247548	0	0.0104	0.0124	0.0103	0.0121	-0.00961538	-0.0241935	0.451393	0.45093	-0.00102571
21	0.6	0.2	0.4	2	50	11.9753	19	12.316	20	0.0284502	0.0526316	0.0846	0.164	0.0808	0.148	-0.0449173	-0.097561	0.421378	0.427278	0.0140017
22	0.6	0.2	0.4	2	100	17.0252	26	17.3815	28	0.0209278	0.0769231	0.0637	0.114	0.0608	0.098	-0.0455259	-0.140351	0.413312	0.410776	-0.0061358
23	0.6	0.2	0.4	2	250	26.961	38	27.325	38	0.013501	0	0.0423	0.0624	0.0405	0.0576	-0.0425532	-0.0769231	0.40765	0.406621	-0.00252422
24	0.6	0.2	0.4	2	500	38.142	48	38.59	48	0.0117456	0	0.0307	0.0424	0.0294	0.038	-0.0423453	-0.103774	0.404995	0.404487	-0.00125434
25	0.6	0.2	0.4	2	1000	54.54	68	54.7	65	0.00293363	-0.0441176	0.0219	0.0278	0.0211	0.0258	-0.0365297	-0.0719424	0.402808	0.402855	0.000116681
26	0.6	0.2	0.4	10	50	12.2526	20	12.3124	20	0.0048806	0	0.0819	0.1472	0.0809	0.1432	-0.01221	-0.0271739	0.410632	0.410454	-0.000433478
27	0.6	0.2	0.4	10	100	17.3169	27	17.3806	26	0.00367849	-0.037037	0.0618	0.0992	0.061	0.0972	-0.012945	-0.0201613	0.411227	0.410743	-0.00117697
28	0.6	0.2	0.4	10	250	27.4525	38	27.5485	38	0.00349695	0	0.0409	0.0582	0.0404	0.0582	-0.0122249	0	0.406901	0.406692	-0.000513638
29	0.6	0.2	0.4	10	500	38.812	51	38.842	49	0.000772957	-0.0392157	0.0298	0.0418	0.0294	0.0406	-0.0134228	-0.0287081	0.404643	0.404543	-0.000247131
30	0.6	0.2	0.4	10	1000	54.21	67	54.27	66	0.00110681	-0.0149254	0.0215	0.0253	0.0212	0.0253	-0.0139535	0	0.403363	0.403284	-0.000195853
31	0.7	0.3	0.4	2	50	12.9058	20	13.3099	21	0.0313115	0.05	0.0937	0.176	0.0886	0.152	-0.054429	-0.136364	0.319517	0.315546	-0.0124281
32	0.7	0.3	0.4	2	100	18.3637	29	18.7668	27	0.0219509	-0.0689655	0.07	0.122	0.0664	0.106	-0.0514286	-0.131148	0.316351	0.31432	-0.00642008
33	0.7	0.3	0.4	2	250	29.214	39	29.6835	40	0.0160711	0.025641	0.0461	0.068	0.0439	0.064	-0.0477223	-0.0588235	0.309763	0.308919	-0.00272466
34	0.7	0.3	0.4	2	500	41.412	51	41.884	52	0.0113977	0.0196078	0.033	0.042	0.0317	0.0412	-0.0393939	-0.0190476	0.305767	0.305533	-0.000765289
35	0.7	0.3	0.4	2	1000	58.93	74	59.38	76	0.00763618	0.027027	0.0237	0.0284	0.0228	0.0266	-0.0379747	-0.0633803	0.304549	0.304509	-0.000131342
36	0.7	0.3	0.4	10	50	13.2606	21	13.3442	21	0.00630439	0	0.09	0.1584	0.0886	0.1464	-0.0155556	-0.0757576	0.311415	0.322961	0.0370759
37	0.7	0.3	0.4	10	100	18.6919	28	18.7731	27	0.00434413	-0.0357143	0.0675	0.1088	0.0664	0.11	-0.0162963	0.0110294	0.31475	0.314335	-0.00131851
38	0.7	0.3	0.4	10	250	29.561	41	29.668	40	0.00361963	-0.0243902	0.0448	0.063	0.0441	0.0614	-0.015625	-0.0253968	0.308926	0.308147	-0.00252164
39	0.7	0.3	0.4	10	500	41.58	51	41.64	52	0.001443	0.0196078	0.0323	0.0454	0.0318	0.0454	-0.0154799	0	0.304037	0.305328	0.00424619
40	0.7	0.3	0.4	10	1000	58.96	71	58.89	71	-0.00118725	0	0.0233	0.0271	0.0228	0.0262	-0.0214592	-0.0332103	0.304475	0.304435	-0.000131374
41	0.8	0.4	0.4	2	50	13.8048	21	14.2599	23	0.0329668	0.0952381	0.1032	0.192	0.096	0.16	-0.0697674	-0.166667	0.234652	0.240655	0.0255826
42	0.8	0.4	0.4	2	100	19.6072	30	20.0848	29	0.0243584	-0.0333333	0.0763	0.128	0.0715	0.118	-0.0629096	-0.078125	0.21852	0.216978	-0.00705656
43	0.8	0.4	0.4	2	250	31.1345	41	31.6	41	0.0149513	0	0.0502	0.0728	0.0473	0.0664	-0.0577689	-0.0879121	0.211259	0.210653	-0.00286852
44	0.8	0.4	0.4	2	500	44.25	58	44.616	59	0.00827119	0.0172414	0.0363	0.0484	0.0343	0.044	-0.0550964	-0.0909091	0.20693	0.206655	-0.00132895
45	0.8	0.4	0.4	2	1000	62.08	73	62.58	70	0.00805412	-0.0410959	0.0259	0.03	0.0246	0.0276	-0.0501931	-0.08	0.204804	0.204549	-0.00124509
46	0.8	0.4	0.4	10	50	14.1862	23	14.2621	22	0.00535027	-0.0434783	0.098	0.1648	0.096	0.1608	-0.0204082	-0.0242718	0.220055	0.230116	0.0457204
47	0.8	0.4	0.4	10	100	20.0068	30	20.1077	30	0.00504329	0	0.0728	0.1172	0.0715	0.1108	-0.0178571	-0.0546075	0.217402	0.217093	-0.00142133
48	0.8	0.4	0.4	10	250	31.757	44	31.8885	44	0.00414082	0	0.0479	0.0677	0.047	0.0658	-0.0187891	-0.028065	0.210765	0.210643	-0.000578844
49	0.8	0.4	0.4	10	500	44.56	55	44.642	55	0.00184022	0	0.0346	0.0449	0.034	0.045	-0.017341	0.00222717	0.207332	0.2072	-0.00063666
50	0.8	0.4	0.4	10	1000	62.77	76	62.76	77	-0.000159312	0.0131579	0.0247	0.0296	0.0243	0.0286	-0.0161943	-0.0337838	0.206305	0.206197	-0.000523497
51	0.9	0.1	0.8	2	50	10.1238	17	10.7037	18	0.0572809	0.0588235	0.1506	0.344	0.1356	0.264	-0.0996016	-0.232558	0.143045	0.13575	-0.0509979
52	0.9	0.1	0.8	2	100	14.4546	23	15.0179	23	0.0389703	0	0.1137	0.224	0.1031	0.184	-0.0932278	-0.178571	0.128282	0.126209	-0.0161597
53	0.9	0.1	0.8	2	250	23.072	32	23.692	33	0.0268724	0.03125	0.0751	0.1248	0.069	0.104	-0.081225	-0.166667	0.117449	0.116623	-0.00703284
54	0.9	0.1	0.8	2	500	32.936	44	33.582	44	0.0196138	0	0.0545	0.076	0.0506	0.0696	-0.0715596	-0.0842105	0.112318	0.111918	-0.00356132
55	0.9	0.1	0.8	2	1000	46.75	55	47.27	55	0.011123	0	0.0383	0.0504	0.036	0.046	-0.0600522	-0.0873016	0.108412	0.108259	-0.00141128
56	0.9	0.1	0.8	10	50	10.5617	19	10.6586	19	0.00917466	0	0.1414	0.2848	0.1369	0.2576	-0.0318246	-0.0955056	0.129845	0.130219	0.00288036
57	0.9	0.1	0.8	10	100	14.9123	23	15.0379	24	0.00842258	0.0434783	0.1063	0.196	0.1036	0.184	-0.0253998	-0.0612245	0.126656	0.126245	-0.00324501
58	0.9	0.1	0.8	10	250	23.643	32	23.735	32	0.00389122	0	0.071	0.1059	0.0693	0.1056	-0.0239437	-0.00283286	0.116407	0.116243	-0.00140885
59	0.9	0.1	0.8	10	500	33.432	44	33.554	43	0.0036492	-0.0227273	0.0511	0.0717	0.0499	0.0659	-0.0234834	-0.0808926	0.111866	0.11177	-0.00085817
60	0.9	0.1	0.8	10	1000	47.41	56	47.49	60	0.00168741	0.0714286	0.037	0.0462	0.0361	0.0442	-0.0243243	-0.04329	0.108386	0.108357	-0.000267562
61	1	0	1	2	50	9.4078	16	10.0517	17	0.0684432	0.0625	0.2041	0.53	0.1583	0.33	-0.2244	-0.377358	0.009519	0.022857	1.4012
62	1	0	1	2	100	13.5633	21	14.1577	23	0.0438241	0.0952381	0.1574	0.365	0.1203	0.21	-0.235705	-0.424658	0.020521	0.019787	-0.0357682
63	1	0	1	2	250	21.816	31	22.3915	33	0.0263797	0.0645161	0.1053	0.204	0.0811	0.14	-0.22982	-0.313725	0.009131	0.00892	-0.0231081
64	1	0	1	2	500	31.1	41	31.54	41	0.0141479	0	0.0769	0.121	0.059	0.085	-0.23277	-0.297521	0.004776	0.004699	-0.0161223
65	1	0	1	2	1000	43.89	55	44.85	54	0.0218729	-0.0181818	0.0542	0.0785	0.0427	0.0515	-0.212177	-0.343949	0.002713	0.00269	-0.0084777
66	1	0	1	10	50	9.9215	17	10.0203	17	0.00995817	0	0.1743	0.458	0.1591	0.316	-0.087206	-0.310044	0.042729	0.036564	-0.144281
67	1	0	1	10	100	14.0702	23	14.1877	23	0.00835098	0	0.1332	0.283	0.1208	0.202	-0.0930931	-0.286219	0.020087	0.019923	-0.00816448
68	1	0	1	10	250	22.3475	31	22.4125	33	0.0029086	0.0645161	0.0903	0.1724	0.0814	0.1276	-0.0985604	-0.259861	0.009245	0.009201	-0.00475933
69	1	0	1	10	500	31.754	41	31.79	42	0.00113372	0.0243902	0.0652	0.097	0.0591	0.079	-0.0935583	-0.185567	0.004785	0.004766	-0.00397074
70	1	0	1	10	1000	44.37	52	44.8	54	0.00969123	0.0384615	0.0468	0.0633	0.0427	0.053	-0.0876068	-0.162717	0.002502	0.002499	-0.00119904
71	1	0.9	0.1	2	50	31.5399	41	31.9853	40	0.0141218	-0.0243902	0.0746	0.098	0.0583	0.079	-0.218499	-0.193878	0.003146	0.003688	0.172282
72	1	0.9	0.1	2	100	44.5831	57	44.9971	58	0.00928603	0.0175439	0.0543	0.088	0.0423	0.0555	-0.220994	-0.369318	0.002666	0.002637	-0.0108777
73	1	0.9	0.1	2	250	70.34	86	70.6725	84	0.00472704	-0.0232558	0.0344	0.051	0.0274	0.0338	-0.203488	-0.337255	0.001186	0.001176	-0.0084317
74	1	0.9	0.1	2	500	99.89	116	100.246	117	0.00356392	0.00862069	0.0243	0.0319	0.0196	0.0233	-0.193416	-0.269592	0.00067	0.000667	-0.00447761
75	1	0.9	0.1	2	1000	143.28	160	143.61	161	0.00230318	0.00625	0.017	0.0213	0.0139	0.0154	-0.182353	-0.276995	0.000841	0.000249	-0.703924
76	1	0.9	0.1	10	50	31.8977	42	32.009	41	0.00348928	-0.0238095	0.0647	0.0978	0.0583	0.0798	-0.0989181	-0.184049	0.004844	0.006836	0.41123
77	1	0.9	0.1	10	100	44.8652	56	44.9748	58	0.00244287	0.0357143	0.0467	0.0717	0.0423	0.0564	-0.0942184	-0.213389	0.002715	0.002709	-0.00220994
78	1	0.9	0.1	10	250	70.6025	84	70.685	84	0.00116851	0	0.0302	0.0406	0.0274	0.034	-0.0927152	-0.162562	0.001192	0.001191	-0.000838926
79	1	0.9	0.1	10	500	99.758	116	99.94	116	0.00182442	0	0.0214	0.0256	0.0196	0.0232	-0.0841121	-0.09375	0.000588	0.000423	-0.280612
80	1	0.9	0.1	10	1000	142.37	158	142.54	158	0.00119407	0	0.015	0.0169	0.0138	0.0154	-0.08	-0.0887574	0.000294	0.000294	0
					Mean	38.3116	48.8125	38.5516	49.15	0.00992038	0.010181	0.0529775	0.0931725	0.0485612	0.0768763	-0.0614452	-0.107866	0.300726	0.300603	0.00850289
					Max.	143.28	160	143.61	161	0.0684432	0.0967742	0.2041	0.53	0.1591	0.33	0	0.0247934	0.894654	0.894469	1.4012
					Min.	9.4078	16	10.0203	17	-0.00118725	-0.0689655	0.0043	0.0052	0.0043	0.0052	-0.235705	-0.424658	0.000294	0.000249	-0.703924
